# Supplementary material
Source: PubMed Central journal article supplement (PMC1851557)

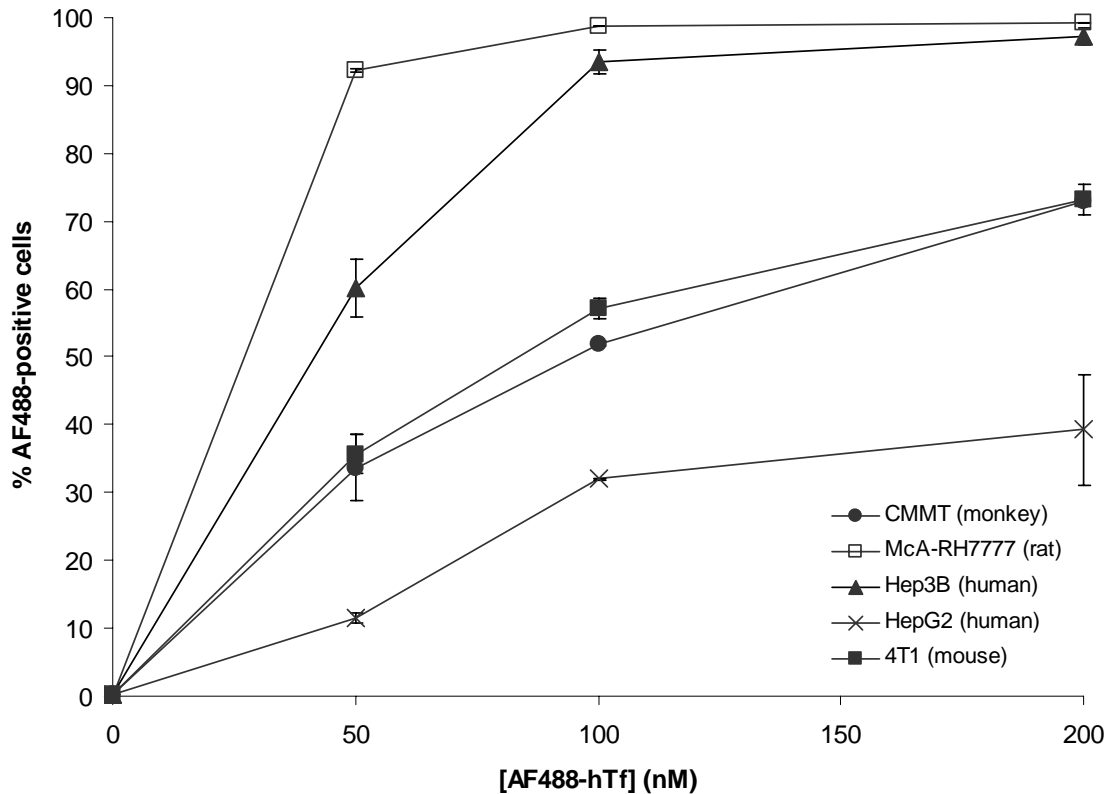

Supplement: pnas_0701458104_1.pdf [file pnas_0701458104_1.pdf]

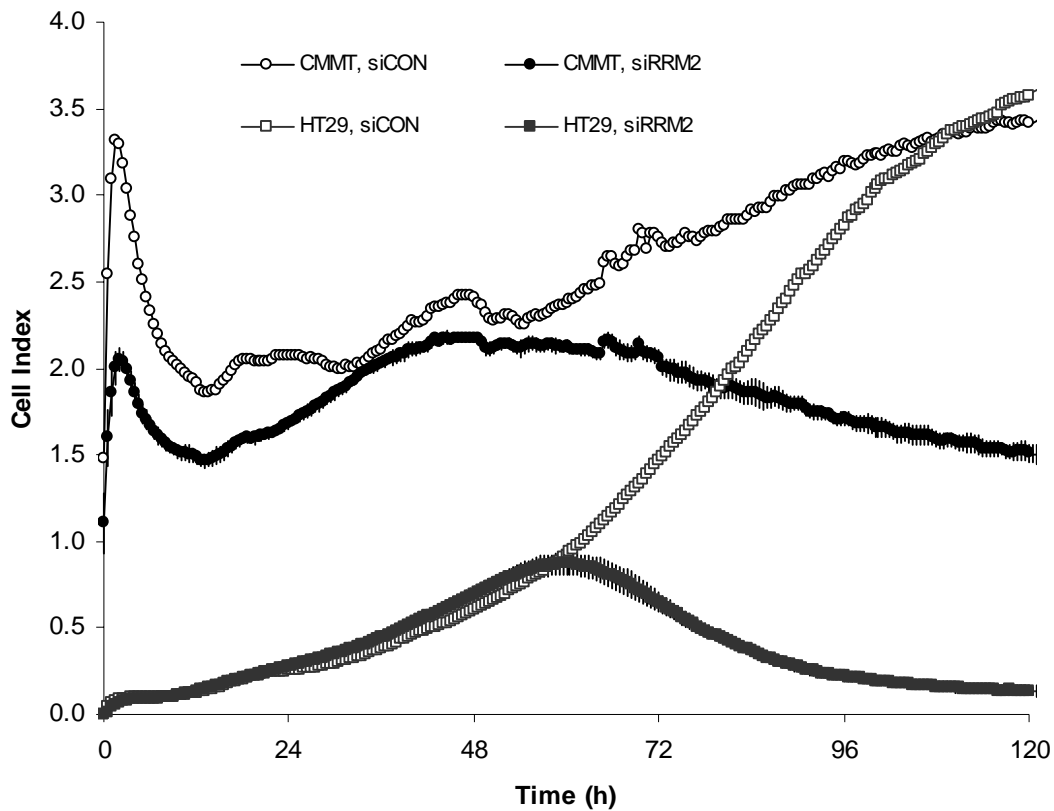

Supplement: pnas_0701458104_2.pdf [file pnas_0701458104_2.pdf]
